# Supplementary material for: Conformational insights and vibrational study of a promising anticancer agent: the role of the ligand in Pd(ii)–amine complexes
Source: Royal Society of Chemistry journal article supplement (doi:10.1039/c5nj01088h), 2015-01-01

**Electronic Supplementary Information to Journal of New Chemistry**

Conformational Insights and Vibrational Study of a Promising Anticancer  
Agent:  
The Role of the Ligand in Pd(II)-Amine Complexes

Sónia M. Fiuza<sup>\*a</sup>, Ana M. Amado<sup>a</sup>, Stewart F. Parker<sup>b</sup>, Maria Paula M. Marques<sup>a,c</sup> and  
Luís A. E. Batista de Carvalho<sup>a</sup>

<sup>a</sup>*Unidade de I&D “Química-Física Molecular”, Departamento de Química,  
Universidade de Coimbra, P-3004 535 Coimbra, Portugal.*

<sup>b</sup>*ISIS Facility, STFC Rutherford Appleton Laboratory, Chilton, Didcot, OX 11 0QX,  
United Kingdom*

<sup>c</sup>*Departamento de Ciências da Vida, P-3000 456, Universidade de Coimbra, Coimbra,  
Portugal*

\*Correspondence author:  
Tel./Fax: +351-239 826541  
email: [sonia.mfiuza@gmail.com](mailto:sonia.mfiuza@gmail.com)

**Figure S1** – Conformational study of Pd<sub>2</sub>-Spm. Input geometries are listed with letters and the obtained optimized conformers (mPW1PW/6-31G\*) are listed in arabic numbers from 1 to 19 in order of increasing energy and thus from the most stable to the less stable one. Configurations are presented in groups, the pink area stands for a non-linear amine configuration and the yellow areas to a region of a fair degree of coplanarity between the metal centre and the central amine. A graphic with the relative energies is also presented.

**Testing geometries with centres in *trans* relative to each other ( $\sim 180^\circ$ )**

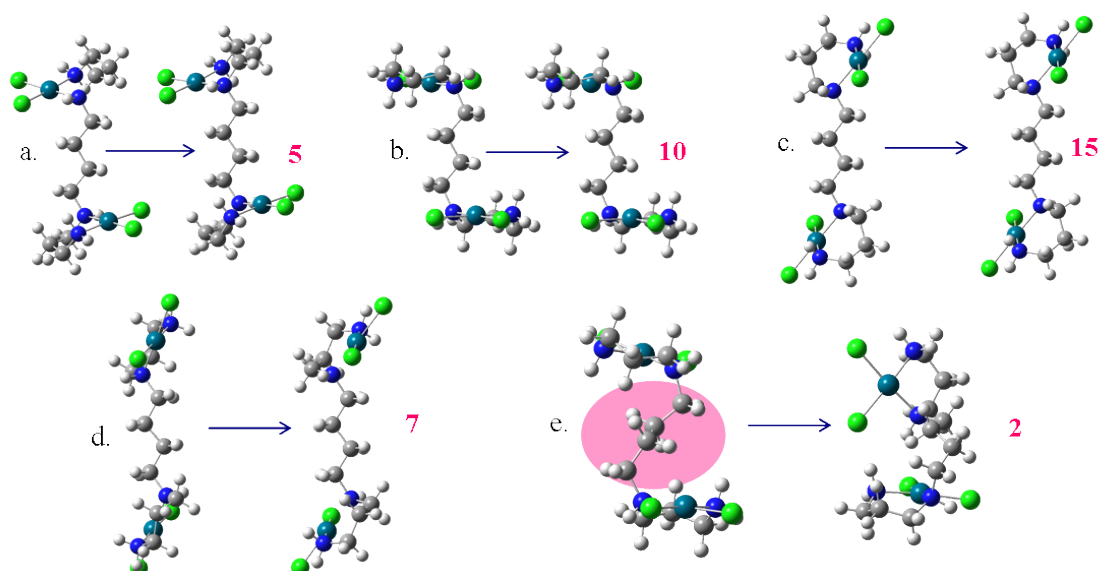

**Testing geometries with centres  $\sim 90^\circ$  to each other**

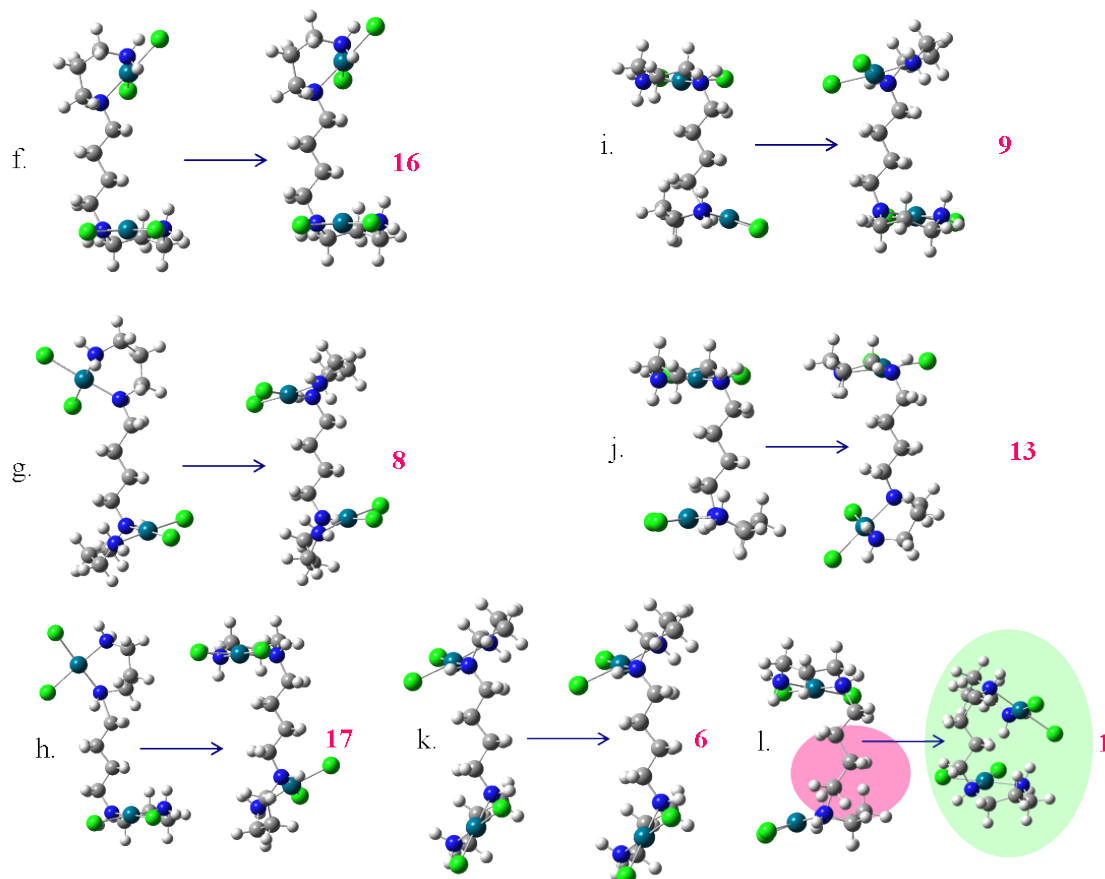

Testing geometries with centres in *cis* relative to each other – linear amine

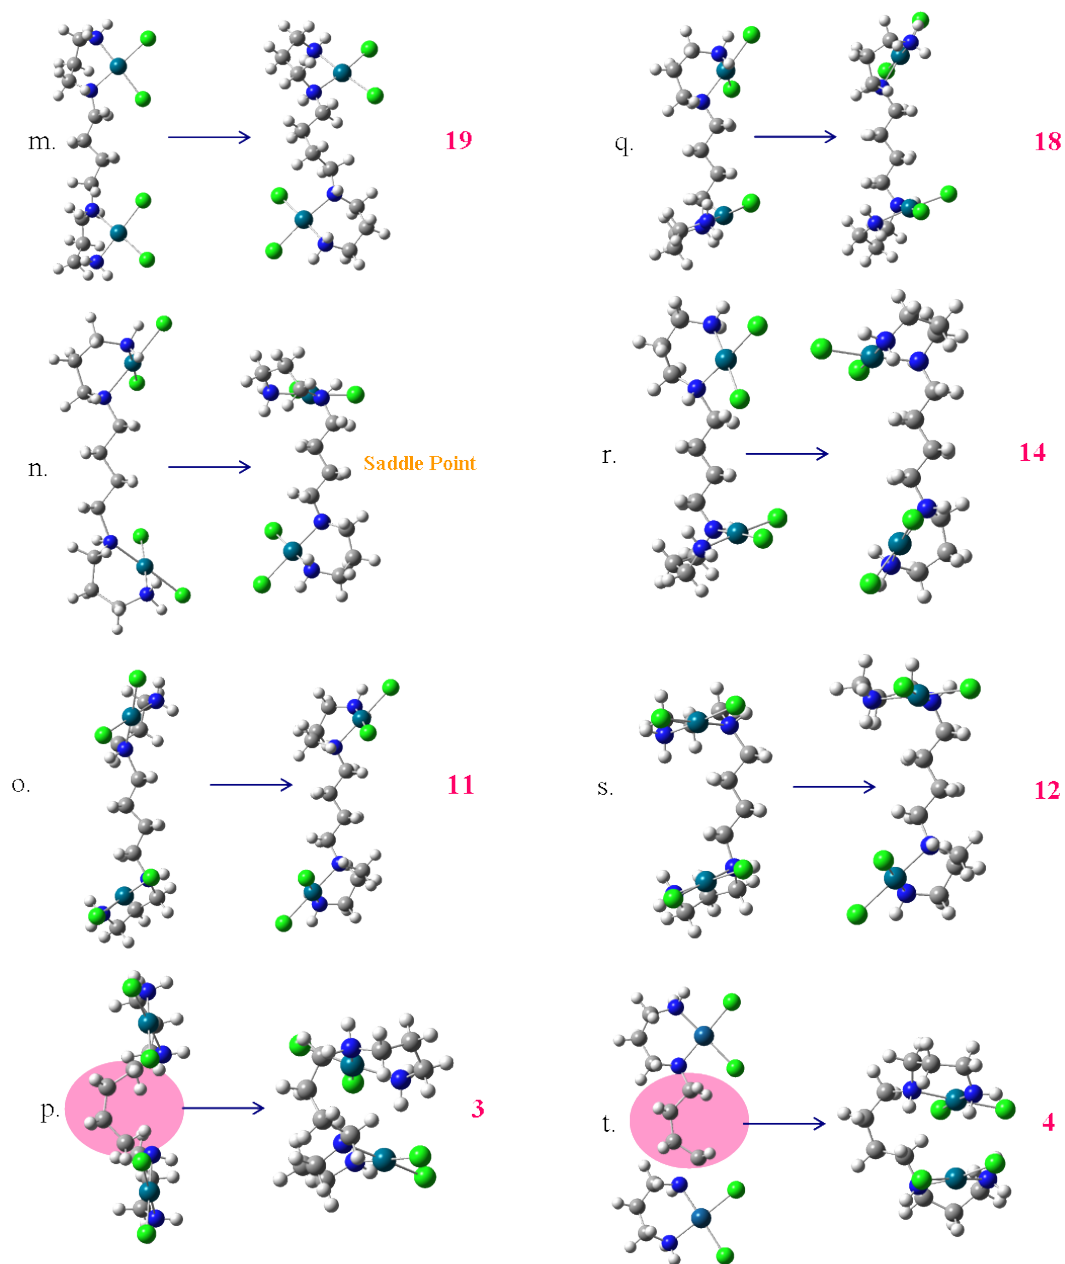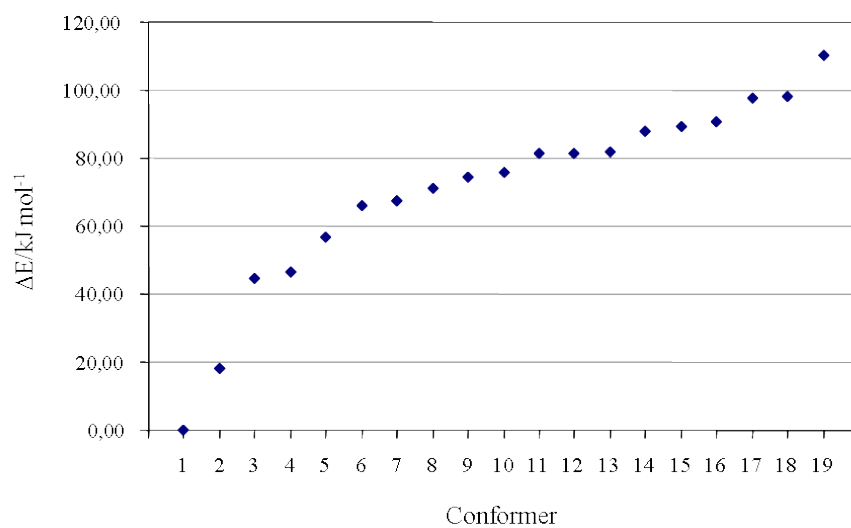

**Figure S2** – Calculated two molecule structure for Pd<sub>2</sub>-Spm.  
(The distance between atoms is in picometers).

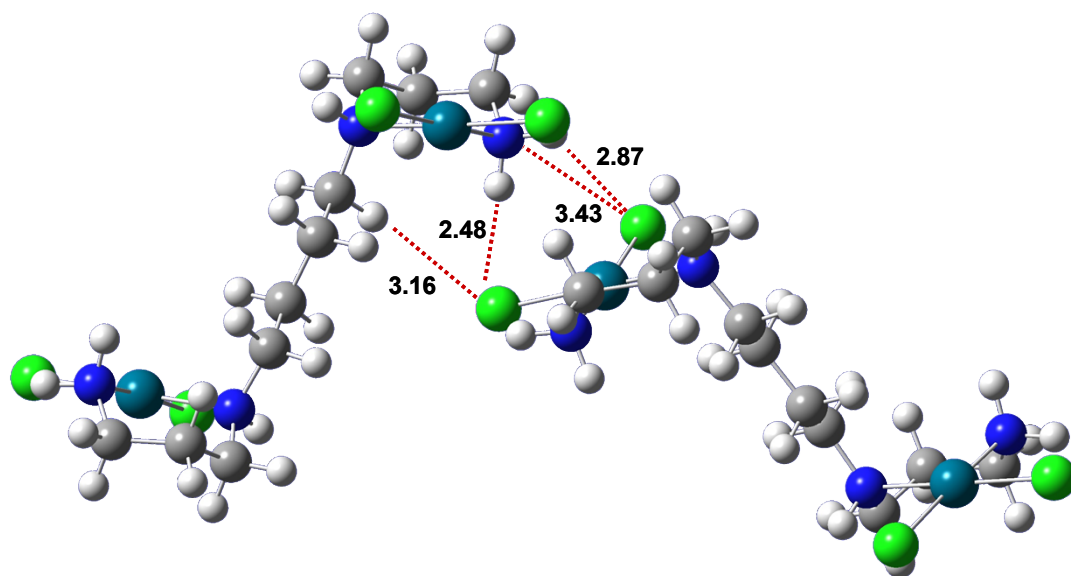

Supplement: c5nj01088h1.pdf [file c5nj01088h1.pdf]
